# Supplementary material
Source: PubMed Central journal article supplement (PMC2686141)
Supplement: blood-2008-11-189845_1.pdf [file blood-2008-11-189845_1.pdf]

| <b>PATIENTS</b> | <b>DIAGNOSTIC</b> | <b>AGE</b> | <b>SEX</b> | <b>WBC</b> |
|-----------------|-------------------|------------|------------|------------|
| ATL1            | Acute ATL         | -          | F          | 12,400     |
| ATL2            | Acute ATL         | 21         | M          | 106,200    |
| ATL3            | Chronic ATL       | -          | M          | 15,300     |
| ATL4            | Acute ATL         | 75         | M          | 61,000     |
| ATL5            | Acute ATL         | -          | M          | -          |
| ATL6            | Acute ATL         | 54         | M          | 35,000     |
| ATL7            | Acute ATL         | 51         | F          | 48,000     |
| ATL8            | Acute ATL         | 28         | M          | 15,820     |
| ATL9            | Acute ATL         | 46         | F          | 7,440      |
| ATL10           | Acute ATL         | -          | F          | -          |
| ATL11           | Acute ATL         | -          | M          | 9,800      |
| ATL12           | Acute ATL         | 25         | F          | 10,400     |
| ATL13           | Acute ATL         | -          | F          | 43,000     |
| ATL14           | Acute ATL         | 27         | M          | 68,600     |
| ATL15           | Acute ATL         | 56         | M          | 29,300     |
