# Supplementary material
Source: PubMed Central journal article supplement (PMC2686141)
Supplement: blood-2008-11-189845_2.pdf [file blood-2008-11-189845_2.pdf]

A

|                | <b>hsa-miR-125a</b> |               | <b>hsa-miR-132</b> |               | <b>hsa-miR-150</b> |               |
|----------------|---------------------|---------------|--------------------|---------------|--------------------|---------------|
|                | <b>Avg Ct</b>       | <b>St dev</b> | <b>Avg Ct</b>      | <b>St dev</b> | <b>Avg Ct</b>      | <b>St dev</b> |
| <b>ATL1</b>    | 34.16               | 0.57          | 37.127             | 0.741         | 25.325             | 0.215         |
| <b>ATL2</b>    | 33.69               | 0.24          | 31.774             | 0.374         | 20.639             | 0.093         |
| <b>ATL3</b>    | 34.01               | 0.41          | 31.995             | 0.190         | 20.384             | 0.131         |
| <b>ATL4</b>    | 32.23               | 0.30          | 34.099             | 0.416         | 22.419             | 0.126         |
| <b>ATL5</b>    | 34.46               | 0.34          | 33.027             | 0.499         | 23.598             | 0.172         |
| <b>ATL6</b>    | 33.44               | 0.17          | 32.682             | 0.070         | 21.973             | 0.217         |
| <b>ATL7</b>    | 31.58               | 0.21          | 33.727             | 0.351         | 22.032             | 0.202         |
| <b>ATL8</b>    | 32.63               | 0.40          | 35.29              | 0.82          | 26.99              | 0.06          |
| <b>ATL9</b>    | 34.47               | 0.60          | 34.11              | 0.28          | 27.27              | 0.12          |
| <b>ATL10</b>   | 31.61               | 0.26          | 34.02              | 0.44          | 26.03              | 0.02          |
| <b>ATL11</b>   | 30.88               | 0.17          | 33.63              | 0.57          | 26.54              | 0.23          |
| <b>ATL12</b>   | 31.34               | 0.44          | 34.05              | 0.57          | 25.65              | 0.07          |
| <b>ATL13</b>   | 30.59               | 0.48          | 32.95              | 0.47          | 24.73              | 0.13          |
| <b>ATL14</b>   | 30.88               | 0.68          | 33.45              | 0.71          | 24.78              | 0.15          |
| <b>Control</b> | 26.95               | 0.18          | 27.674             | 0.116         | 22.754             | 0.213         |

**B**

|                | <b>hsa-miR-223</b> |               | <b>hsa-miR-155</b> |               | <b>hsa-miR-24</b> |               |
|----------------|--------------------|---------------|--------------------|---------------|-------------------|---------------|
|                | <b>Avg Ct</b>      | <b>St dev</b> | <b>Avg Ct</b>      | <b>St dev</b> | <b>Avg Ct</b>     | <b>St dev</b> |
| <b>ATL1</b>    | 26.34              | 0.12          | 33.51              | 0.30          | 28.676            | 0.173         |
| <b>ATL2</b>    | 26.28              | 0.17          | 30.09              | 0.05          | 24.980            | 0.181         |
| <b>ATL3</b>    | 27.00              | 0.27          | 29.28              | 0.29          | 26.442            | 0.202         |
| <b>ATL4</b>    | 29.76              | 0.10          | 29.98              | 0.47          | 25.409            | 0.141         |
| <b>ATL5</b>    | 24.27              | 0.07          | 31.09              | 0.27          | 25.978            | 0.192         |
| <b>ATL6</b>    | 25.24              | 0.21          | 32.76              | 0.31          | 26.346            | 0.190         |
| <b>ATL7</b>    | 25.28              | 0.24          | 29.06              | 0.19          | 25.780            | 0.139         |
| <b>ATL8</b>    | 25.07              | 0.41          | -                  | -             | 30.29             | 0.18          |
| <b>ATL9</b>    | 26.26              | 0.11          | -                  | -             | 31.15             | 0.15          |
| <b>ATL10</b>   | 23.58              | 0.21          | -                  | -             | 29.80             | 0.24          |
| <b>ATL11</b>   | 23.49              | 0.21          | -                  | -             | 29.93             | 0.09          |
| <b>ATL12</b>   | 25.75              | 0.21          | -                  | -             | 28.62             | 0.24          |
| <b>ATL13</b>   | 24.83              | 0.22          | -                  | -             | 29.11             | 0.19          |
| <b>ATL14</b>   | 25.57              | 0.24          | 30.02              | 0.42          | 30.10             | 0.11          |
| <b>Control</b> | 26.03              | 0.17          | 43.22              | 0.28          | 24.160            | 0.029         |

C

|         | <b>hsa-miR-125a</b> |               | <b>hsa-miR132</b> |               | <b>hsa-miR142.3p</b> |               | <b>hsa-miR-150</b> |               |
|---------|---------------------|---------------|-------------------|---------------|----------------------|---------------|--------------------|---------------|
|         | <b>Avg Ct</b>       | <b>St dev</b> | <b>Avg Ct</b>     | <b>St dev</b> | <b>Avg Ct</b>        | <b>St dev</b> | <b>Avg Ct</b>      | <b>St dev</b> |
| C8166   | >45                 | ND            | 31.519            | 0.299         | 25.029               | 0.060         | 36.345             | 0.381         |
| MT2     | 28.39               | 0.14          | 30.588            | 0.211         | 24.767               | 0.064         | 37.802             | 1.418         |
| MT4     | 28.98               | 0.11          | 31.729            | 0.443         | 24.196               | 0.041         | 37.837             | -             |
| HUT102  | >45                 | ND            | 30.321            | 0.208         | 23.782               | 0.142         | 33.003             | 0.120         |
| LAF     | 28.42               | 0.17          | 31.336            | 0.139         | 23.856               | 0.089         | 27.433             | 0.318         |
| MU04    | 27.67               | 0.09          | 29.082            | 0.127         | 24.175               | 0.178         | 29.060             | 0.255         |
| Control | 26.95               | 0.18          | 27.674            | 0.116         | 32.597               | 0.293         | 22.754             | 0.213         |

|         | <b>hsa-miR-155</b> |               | <b>hsa-miR-181a</b> |               | <b>hsa-miR-223</b> |               | <b>hsa-miR-24</b> |               |
|---------|--------------------|---------------|---------------------|---------------|--------------------|---------------|-------------------|---------------|
|         | <b>Avg Ct</b>      | <b>St dev</b> | <b>Avg Ct</b>       | <b>St dev</b> | <b>Avg Ct</b>      | <b>St dev</b> | <b>Avg Ct</b>     | <b>St dev</b> |
| C8166   | 25.4               | 0.6           | 33.472              | 0.084         | 34.19              | 0.53          | 25.251            | 0.320         |
| MT2     | 27.84              | 0.11          | 32.781              | 0.384         | 34.46              | 0.25          | 26.720            | 0.200         |
| MT4     | 28.49              | 0.19          | 30.187              | 0.168         | 33.66              | 0.48          | 25.602            | 0.140         |
| HUT102  | 26.75              | 0.06          | 29.042              | 0.111         | 33.96              | 0.60          | 24.573            | 0.114         |
| LAF     | 26.75              | 0.38          | 29.400              | 0.194         | 32.99              | 0.25          | 24.222            | 0.176         |
| MU04    | 25.92              | 0.20          | 30.235              | 0.134         | 31.83              | 0.10          | 23.430            | 0.075         |
| Control | 43.22              | 0.28          | 27.996              | 0.318         | 26.03              | 0.17          | 24.160            | 0.029         |
