# Supplementary material
Source: PubMed Central journal article supplement (PMC2686141)
Supplement: blood-2008-11-189845_3.pdf [file blood-2008-11-189845_3.pdf]

| <b>microRNA:</b> | <b>Target microRNAs:</b> | <b>Gene Name:</b>                                  | <b>Predicted Target: Pictar</b> | <b>Predicted Target: Target-scan</b> | <b>Predicted Target: miRBase</b> | <b>Function:</b>                                                                                    |
|------------------|--------------------------|----------------------------------------------------|---------------------------------|--------------------------------------|----------------------------------|-----------------------------------------------------------------------------------------------------|
| miR-125a         | <i>MLF2</i>              | Myeloid leukemia factor-2                          | Yes                             | Yes                                  | Yes                              | Hemopoietic differentiation and erythroid/ myeloid lineage switching                                |
| miR-125a         | <i>LIFR</i>              | Leukemia inhibitory factor-receptor                | Yes                             | Yes                                  | -                                | Macrophage differentiation                                                                          |
| miR-125a         | <i>IL-16</i>             | Interleukin-16                                     | Yes                             | Yes                                  | Yes                              | Pro-inflammatory cytokine                                                                           |
| miR-125a         | <i>STAT3</i>             | Signal transducer and activator of transcription 3 | Yes                             | Yes                                  | -                                | Transcription factor that binds to the interleukin-6 (IL-6)-responsive elements                     |
| miR-125a         | <i>STAT2</i>             | Signal transducer and activator of transcription 2 | -                               | -                                    | Yes                              | Transcription factor that activates the transcription of interferon stimulated genes                |
| miR-125a         | <i>IRF-4</i>             | Interferon regulatory factor 4                     | Yes                             | Yes                                  | -                                | Transcriptional activator that binds to the ISRE of the MHC class I promoter                        |
| miR-125a         | <i>MCL-1</i>             | Myeloid cell leukemia sequence 1                   | Yes                             | Yes                                  | -                                | Anti-apoptotic member of Bcl2 family                                                                |
| miR-125a         | <i>GAB2</i>              | GRB2-associated binding protein 2                  | Yes                             | Yes                                  | -                                | Adaptor protein for signaling pathways (B- and T-cell Ag receptors)                                 |
| miR-125a         | <i>LAT</i>               | Linker for activation of T-cells                   | -                               | -                                    | Yes                              | Links TCR to the biochemical events of T-cell activation                                            |
| miR-125a         | <i>LYL1</i>              | Lymphoblastic leukemia-derived sequence 1          | -                               | -                                    | Yes                              | Transcription factor involved in T-cell acute lymphoblastic leukemia                                |
| miR-132          | <i>PTBP2</i>             | polypyrimidine tract binding protein 2             | Yes                             | Yes                                  | -                                | RNA-binding protein which binds to polypyrimidine tracts.                                           |
| miR-132          | <i>LCK</i>               | Lymphocyte cell-specific protein-tyrosine kinase   | -                               | -                                    | Yes                              | Lymphoid specific protein tyrosine kinase                                                           |
| miR-132          | <i>CD72</i>              | B-cell differentiation antigen CD72 (Lyb-2)        | -                               | -                                    | Yes                              | Expressed on all cells of B cell lineage (with exception of plasma cells) and weakly on macrophages |
| miR-132          | <i>STAT4</i>             | Signal transducer and activator of transcription 4 | -                               | -                                    | Yes                              | Mediates responses to IL-12 in lymphocytes, and regulates the differentiation of T helper cells     |

| microRNA:  | Target microRNAs: | Gene Name:                                                  | Predicted Target: Pictar | Predicted Target: Target-scan | Predicted Target: miRBase | Function:                                                                            |
|------------|-------------------|-------------------------------------------------------------|--------------------------|-------------------------------|---------------------------|--------------------------------------------------------------------------------------|
| miR-142.3p | <i>PTPN23</i>     | Tyrosine-protein phosphatase non-receptor type 23           | Yes                      | Yes                           | Yes                       | Protein tyrosine phosphatase                                                         |
| miR-142.3p | <i>IRAK1</i>      | Interleukin-1 receptor-associated kinase 1                  | Yes                      | Yes                           | -                         | Serine/ threonine kinase that associates with the interleukin-1 receptor             |
| miR-142.3p | <i>MLLT7</i>      | Myeloid/lymphoid or mixed-lineage leukemia, transl. to 7    | Yes                      | Yes                           | -                         | Fork-head transcription factor , chromosomal aberrations involved in acute leukemias |
| miR-142.3p | <i>IL-10</i>      | Interleukin-10                                              | -                        | -                             | Yes                       | Cytokine that stimulates other immune cells to divide and differentiate              |
| miR-142.3p | <i>IL-21</i>      | Interleukin-21                                              | -                        | -                             | Yes                       | Growth factor for naive B cells.                                                     |
| miR-142.3p | <i>MMD</i>        | Monocyte to macrophage differentiation-associated           | -                        | Yes                           | Yes                       | Expressed in in vitro differentiated macrophages                                     |
| miR-142.3p | <i>TCF8</i>       | Transcription factor 8 (represses interleukin 2 expression) | Yes                      | -                             | -                         | Inhibits interleukin 2 gene expression                                               |
| miR-142.3p | <i>CRTAM</i>      | Class-I MHC-restricted T cell associated molecule           | Yes                      | Yes                           | -                         | Highly expressed surface markers for activated CD8 T-cells and NK cells              |
| miR-142.3p | <i>LAT</i>        | Linker for activation of T-cells family member 1            | -                        | -                             | Yes                       | Links TCR to the biochemical events of T-cell activation                             |
| miR-142.3p | <i>CD27</i>       | T-cell activation antigen CD27                              | -                        | -                             | Yes                       | Tumor necrosis factor receptor superfamily, predominantly on lymphocytes             |
| miR-150    | <i>v-myb</i>      | v-myb myeloblastosis viral oncogene homolog                 | Yes                      | Yes                           | -                         | Controls proliferation and differentiation of hematopoietic progenitor cells         |
| miR-150    | <i>IRAK2</i>      | Interleukin-1 receptor-associated kinase 2                  | -                        | Yes                           | Yes                       | Serine/ threonine kinase that associates with the interleukin-1 receptor             |
| miR-150    | <i>MLLT7</i>      | Myeloid/lymphoid or mixed-lineage leukemia, transl. to 7    | Yes                      | Yes                           | -                         | Fork-head transcription factor , chromosomal aberrations involved in acute leukemias |
| miR-150    | <i>NFATC4</i>     | Nuclear factor of activated T-cells, cytoplasmic 4          | -                        | -                             | Yes                       | Member of the nuclear factors of activated T cells DNA-binding                       |

| microRNA: | Target microRNAs: | Gene Name:                                                  | Predicted Target: Pictar | Predicted Target: Target-scan | Predicted Target: miRBase | Function:                                                                                                 |
|-----------|-------------------|-------------------------------------------------------------|--------------------------|-------------------------------|---------------------------|-----------------------------------------------------------------------------------------------------------|
|           |                   |                                                             |                          |                               |                           | transcription complex                                                                                     |
| miR-150   | <i>SOCS-1</i>     | Suppressor of cytokine signaling 1                          | -                        | -                             | Yes                       | Negative regulator of JAK-STAT signal pathway                                                             |
| miR-150   | <i>SRF</i>        | Serum response factor                                       | Yes                      | Yes                           |                           | Transcription factor that binds the serum response element                                                |
| miR-150   | <i>PU.1</i>       | Transcription factor PU.1                                   | -                        | -                             | Yes                       | Transcriptional activator that is involved in the differentiation or activation of macrophages or B-cells |
| miR-150   | <i>TRAF2</i>      | TNF receptor-associated factor 2                            | -                        | -                             | Yes                       | Signal transducer for TNFR2 and CD40 that mediates activation of NF-κB.                                   |
| miR-150   | <i>Notch3</i>     | Notch homolog 3 (Drosophila)                                | Yes                      | Yes                           | Yes                       | Receptor for to regulate cell-fate determination                                                          |
| mir-150   | <i>TCF8</i>       | Transcription factor 8 (represses interleukin 2 expression) | Yes                      | -                             | -                         | Inhibits interleukin 2 gene expression                                                                    |
| miR-150   | <i>SOCS-7</i>     | Suppressor of cytokine signaling 7                          | -                        | -                             | Yes                       | Regulates cytokine signal transduction                                                                    |
| miR-150   | <i>STAT4</i>      | Signal transducer and activator of transcription 4          | -                        | -                             | Yes                       | Mediates responses to IL-12 in lymphocytes, and regulates the differentiation of T helper cells           |
| miR-155   | <i>SOCS-1</i>     | Suppressor of cytokine signaling 1                          | Yes                      | -                             | Yes                       | Negative regulator of JAK-STAT signal pathway                                                             |
| miR-155   | <i>CTLA4</i>      | Cytotoxic T-lymphocyte-associated protein 4                 | Yes                      | Yes                           | -                         | T cell differentiation and maintenance of peripheral T cell tolerance to self antigens.                   |
| miR-155   | <i>SOCS-6</i>     | Suppressor of cytokine signaling 6                          | Yes                      | Yes                           | -                         | Regulates cytokine signal transduction                                                                    |
| miR-155   | <i>PU.1</i>       | Transcription factor PU.1                                   | -                        | -                             | Yes                       | Transcriptional activator that is involved in the differentiation or activation of macrophages or B-cells |
| miR155    | <i>JAK2</i>       | Janus kinase 2                                              | -                        | -                             | Yes                       | Tyrosine kinase that phosphorylates and activates STATs                                                   |
| miR-155   | <i>IL-6</i>       | Interleukin-6                                               | -                        | -                             | Yes                       | Cytokine involved in the                                                                                  |

| microRNA: | Target microRNAs: | Gene Name:                                                     | Predicted Target: Pictar | Predicted Target: Target-scan | Predicted Target: miRBase | Function:                                                                                                                      |
|-----------|-------------------|----------------------------------------------------------------|--------------------------|-------------------------------|---------------------------|--------------------------------------------------------------------------------------------------------------------------------|
|           |                   |                                                                |                          |                               |                           | responses that occur after infection and cellular injury                                                                       |
| miR-155   | <i>NFAT5</i>      | Nuclear factor of activated T-cells, 5                         | Yes                      | Yes                           | -                         | Part of transcription complex that collectively regulate the immune response                                                   |
| miR-155   | <i>CD58</i>       | Lymphocyte function-associated antigen 3 precursor             | -                        | -                             | Yes                       | Expressed on most hematopoietic cells, especially memory T-cells and dendritic cells                                           |
| miR-155   | <i>CSF1R</i>      | Macrophage colony-stimulating factor 1 receptor precursor      | -                        | -                             | Yes                       | Receptor for cytokine which controls the production, differentiation, and function of macrophages                              |
| miR-155   | <i>TRAF6</i>      | TNF receptor-associated factor 6                               | -                        | -                             | Yes                       | Mediates signaling from members of the TNF receptor superfamily, and the Toll/IL-1 family                                      |
| miR-181a  | <i>PIAS-3</i>     | Protein inhibitor of activated STAT protein 3                  | Yes                      | Yes                           | Yes                       | Protein inhibitor of activated STAT family                                                                                     |
| miR-181a  | <i>SOS-1</i>      | Son of sevenless homolog 1                                     | -                        | -                             | Yes                       | Activator of ras proteins                                                                                                      |
| miR-181a  | <i>IL-2</i>       | Interleukin-2                                                  | -                        | -                             | Yes                       | Cytokine that is important for the proliferation of T and B lymphocytes                                                        |
| miR-181a  | <i>CD163</i>      | Scavenger receptor cysteine-rich type 1 protein M130 precursor | Yes                      | -                             | Yes                       | Expressed exclusively on cell surface of monocytes and macrophages that evolve predominantly in the late phase of inflammation |
| miR-181a  | <i>CD4</i>        | Homo sapiens CD4 antigen (p55) (CD4)                           | Yes                      | -                             | -                         | Involved in binding to MHC class II molecules                                                                                  |
| miR-181a  | <i>Smad7</i>      | SMAD family member 7                                           | Yes                      | Yes                           | -                         | Component in the signaling pathways of the serine/threonine kinase receptors of the TGF-beta super family.                     |
| miR-181a  | <i>PTPN9</i>      | protein tyrosine phosphatase, non-receptor type 9              | Yes                      | Yes                           | -                         | Protein tyrosine phosphatase                                                                                                   |
| miR-181a  | <i>HLA-DRA</i>    | Major histocompatibility complex, class II, DR alpha precursor | -                        | -                             | Yes                       | MHC class II molecule, presents intracellular peptides to T-cells                                                              |

| microRNA: | Target microRNAs: | Gene Name:                                                | Predicted Target: Pictar | Predicted Target: Target-scan | Predicted Target: miRBase | Function:                                                                                         |
|-----------|-------------------|-----------------------------------------------------------|--------------------------|-------------------------------|---------------------------|---------------------------------------------------------------------------------------------------|
| miR-181a  | <i>NFATC3</i>     | Nuclear factor of activated T-cells, cytoplasmic 3        | -                        | -                             | Yes                       | Member of the nuclear factors of activated T cells DNA-binding transcription complex              |
| miR-181a  | <i>CD94</i>       | Natural killer cells antigen CD94 (NK cell receptor)      | -                        | -                             | Yes                       | Receptor for the recognition of MHC class I molecules by NK cells and some cytotoxic T cells      |
| miR-181a  | <i>NFAT5</i>      | Nuclear factor of activated T-cells, 5                    | -                        | Yes                           | -                         | Part of transcription complex that collectively regulate the immune response                      |
| miR-181a  | <i>CD69</i>       | CD69 molecule (activation of T-cells)                     | -                        | Yes                           | -                         | Involved in lymphocyte proliferation                                                              |
| miR-223   | <i>NFI-A</i>      | Nuclear factor-1A                                         | -                        | -                             | Yes                       |                                                                                                   |
| miR-223   | <i>DUSP10</i>     | Dual specificity protein phosphatase 10                   | -                        | Yes                           | Yes                       | Involved in the inactivation of MAP kinases                                                       |
| miR-223   | <i>HLF</i>        | Hepatic leukemia factor                                   | Yes                      | Yes                           | -                         | Member of the proline and acidic-rich (PAR) protein family                                        |
| miR-223   | <i>PTBP2</i>      | polypyrimidine tract binding protein 2                    | Yes                      | Yes                           | -                         | RNA-binding protein which binds to polypyrimidine tracts.                                         |
| miR-223   | <i>CSF1R</i>      | Macrophage colony-stimulating factor 1 receptor precursor | -                        | -                             | Yes                       | Receptor for cytokine which controls the production, differentiation, and function of macrophages |
| miR-223   | <i>TNF-C</i>      | Tumor necrosis factor c                                   | -                        | -                             | Yes                       | Induces the inflammatory response and is involved in normal development of lymphoid tissue        |
| miR-223   | <i>TRAF3IP3</i>   | TRAF3-interacting protein 3                               | -                        | -                             | Yes                       | May function as adapter molecule, regulating TRAF3-mediated JNK activation                        |
| miR-223   | <i>SOS-1</i>      | Son of sevenless homolog 1                                | -                        | -                             | Yes                       | Activator of ras proteins                                                                         |
| miR-223   | <i>TLR3</i>       | Toll-like receptor, 3                                     | -                        | -                             | Yes                       | Receptor that recognizes pathogens and activates innate immunity                                  |
| miR-223   | <i>CD94</i>       | Natural killer cells antigen CD94                         | -                        | -                             | Yes                       | Receptor for the recognition of MHC class I molecules by NK cells and some cytotoxic T cells      |
| miR-223   | <i>DUSP19</i>     | Dual specificity                                          | -                        | -                             | Yes                       | A stress-activated                                                                                |

| <b>microRNA:</b> | <b>Target microRNAs:</b> | <b>Gene Name:</b>      | <b>Predicted Target: Pictar</b> | <b>Predicted Target: Target-scan</b> | <b>Predicted Target: miRBase</b> | <b>Function:</b>                                           |
|------------------|--------------------------|------------------------|---------------------------------|--------------------------------------|----------------------------------|------------------------------------------------------------|
|                  |                          | protein phosphatase 19 |                                 |                                      |                                  | protein kinase pathway-regulating phosphatase              |
| miR-223          | <i>IL-23a</i>            | Interleukin-23, alpha  | -                               | -                                    | Yes                              | Cytokine that preferentially acts on memory CD4(+) T cells |
